# Supplementary material for: Disparities in the offer of COVID-19 vaccination to migrants and non-migrants in Norway: a cross sectional survey study
Source: Research Square preprint supplement (doi:10.21203/rs.3.rs-1522478/v1), 2022-04-21
Supplement: Supplementary file 1 [file c6f5ccdee3fd464ce816176e.docx]

**Supplementary Table 1.** Survey questions used in analyses.

| **Question** | **Possible Answers in Survey** | **Modifications for Analyses** |
| --- | --- | --- |
| In what country were you born? (Only asked of those born outside Norway) | 63 countries, as well as “Another country” and “Do not want to answer” | Responses were grouped as: a) Nordic (excluding Norway; Greenland and Åland Islands were not listed as options) vs. non-Nordic (all other options), and b) EU (includes EEA, Switzerland, and Great Britain. Republic of Cyrus was not listed as an option, and Norway excluded) vs. non-EU (all other options). Further, the top 5 most represented countries were identified, excluding “Another country”, which was the most represented overall. |
| How long have you lived in Norway? (Only asked of those born outside Norway) | Open text box for number of years | The median was calculated as 15 years. Respondents who answered were categorized as below the median or at the median or above. |
| Sex | Used information from Kantar database; only male and female possible. | N/A |
| Age Group | Used information from Kantar database. | Grouped in categories of 18-29, 30-44, 45-59, and 60+ |
| Some groups may be at higher risk for severe COVID-19. Do you have? | Allowed to select yes/no for: chronic lung disease; chronic cardiovascular disease; liver failure; kidney failure; neurological disease or injury; impaired immune system confirmed by a doctor or hospital; diabetes; mental or other learning or developmental disabilities; impaired hearing or vision, blind or deaf; physical mobility impairment. Most options included clarifying examples. | Classified into two categories: no underlying conditions and at least one underlying condition. Excluded respondents who did not answer yes or no to most or all of the categories. |
| What kind of job do you have? Select the option that fits best / you spend the most time on. [During the pandemic]. | Customer service representative who must have personal contact; Office work in an office community with others; Office work where you can mostly work at home; Work in educational institution/school/ kindergarten etc. with contact with children/youth; Work in health trusts with patient contact; Other work without contact with customers/patients/ children and young people. | Initial analyses use all categories, while some secondary analyses collapse the responses into health-related or non-health jobs. |
| What language do you speak at home? (Asked of all respondents regardless of birth country) | a) Only Norwegian, b) Norwegian and another language, c) Only a language other than Norwegian | N/A |
| What is your highest completed schooling? | Primary school education - 10-year primary school, 7-year primary school; Upper secondary general education; Upper secondary vocational education; Vocational school/ Vocational education (1/2 - 2 years) based on upper secondary vocational education; University/college education with up to 4 years duration; University/college education with more than 4 years duration | Collapsed into at least some university (the last two options) and no university (remaining options) |

**Supplementary Table 2.** Net response rates, composition of and differences between the net and gross samples

|  | Net response rates (%) | Composition of gross sample n (%) | Composition of net sample n (%) | Percentage points differences between net and gross samples |
| --- | --- | --- | --- | --- |
| Total | 9.1 | 59978 (100) | 5442 (100) |  |
| Sex |  |  |  |  |
| Male | 7.4 | 30764 (51.3) | 2270 (41.7) | -9.6 |
| Female | 10.9 | 29214 (48.7) | 3171 (58.3) | 9.6 |
| Age |  |  |  |  |
| 18-29 | 6.8 | 10849 (18.1) | 737 (13.5) | -4.6 |
| 30-44 | 8.7 | 18781 (31.3) | 1637 (30.1) | -1.2 |
| 45-59 | 9.8 | 15267 (25.5) | 1496 (27.5) | 2.0 |
| 60+ | 10.4 | 15081 (25.1) | 1571 (28.9) | 3.8 |
| Parish |  |  |  |  |
| Alna | 8.1 | 12222 (20.4) | 987 (18.1) | -2.3 |
| Bjerke | 9.2 | 8384 (14.0) | 772 (14.2) | 0.2 |
| Gamle Oslo | 11.1 | 14761 (24.6) | 1637 (30.1) | 5.5 |
| Grorud | 8.0 | 6768 (11.3) | 538 (9.9) | -1.4 |
| Stovner | 7.4 | 8204 (13.7) | 611 (11.2) | -2.5 |
| Søndre Nordstrand | 9.3 | 9639 (16.1) | 896 (16.5) | 0.4 |

**Supplementary Table 3.** Logistic regression results for the outcome of being offered a COVID-19 vaccine by years lived in Norway, controlling for covariates related to prioritization of vaccination.

| **Covariate** | **N (%) Not Offered** | **N (%) Offered** | **Full Model** | **Covariate** | **N (%) Not Offered** | **N (%) Offered** | **Full Model** | **Covariate** | **N (%) Not Offered** | **N (%) Offered** | **Full Model** |
| --- | --- | --- | --- | --- | --- | --- | --- | --- | --- | --- | --- |
| Non-migrant | 593 (25.7) | 1710 (74.3) | Ref | Non-migrant | 593 (25.7) | 1710 (74.3) | Ref | Migrant, lived in Norway 15+ years | 80 (19.0) | 340 (81.0) | Ref |
| Migrant, lived in Norway <15 years | 237 (52.7) | 213 (47.3) | **.63 (.50-.80)** | Migrant, lived in Norway 15+ years | 80 (19.0) | 340 (81.0) | 1.04 (.75-1.44) | Migrant, lived in Norway <15 years | 237 (52.7) | 213 (47.3) | **.57 (.40-.81)** |
| 18-29 | 197 (58.8) | 138 (41.2) | Ref | 18-29 | 167 (57.8) | 122 (42.2) | Ref | 18-29 | 62 (64.6) | 34 (35.4) | Ref |
| 30-44 | 620 (54.9) | 509 (45.1) | **1.36 (1.08-1.72)** | 30-44 | 496 (51.1) | 475 (48.9) | **1.64 (1.27-2.12)** | 30-44 | 246 (54.4) | 206 (45.6) | 1.32 (.88-1.98) |
| 45-59 | 12 (1.3) | 929 (98.7) | **128.41 (66.64-247.44)** | 45-59 | 10 (0.9) | 1069 (99.1) | **235.89 (109.03-510.37**) | 45-59 | 8 (3.0) | 258 (97.0) | **41.81 (18.56-94.16)** |
| 60+ | 1 (0.3) | 347 (99.7) | **334.49 (51.21-2184.77)** | 60+ | 0 (0.0) | 384 (100.0) | X | 60+ | 1 (1.8) | 55 (98.2) | **41.09 (5.88 -287.02)** |
| No underlying | 765 (33.7) | 1506 (66.3) | Ref | No underlying | 630 (28.4) | 1588 (71.6) | Ref | No underlying | 285 (40.9) | 412 (59.1) | Ref |
| Any underlying | 65 (13.5) | 417 (86.5) | **2.92 (2.15-3.98)** | Any underlying | 43 (8.5) | 462 (91.5) | **3.82 (2.69-5.44)** | Any underlying | 32 (18.5) | 141 (81.5) | **2.62 (1.66-4.12)** |
| Non-health job | 818 (33.8) | 1601 (66.2) | Ref | Non-health job | 661 (28.0) | 1697 (72.0) | Ref | Non-health job | 307 (42.1) | 422 (57. 9) | Ref |
| Health job | 12 (3.6) | 322 (96.4) | **24.25 (13.90-42.30)** | Health job | 12 (3.3) | 353 (96.7) | **20.66 (11.80-36.15)** | Health job | 10 (7.1) | 131 (92.9) | **11.21 (6.03-20.84)** |
| Alna | 127 (27.4) | 337 (72.6) | Ref | Alna | 103 (22.2) | 361 (77.8) | Ref | Alna | 46 (29.1) | 112 (70.9) | Ref 1 |
| Bjerke | 122 (28.2) | 310 (71.8) | .96 (.68-1.36) | Bjerke | 96 (22.4) | 332 (77.6) | .98 (.67-1.43) | Bjerke | 40 (33.9) | 78 (66.1) | 1.01 (.58-1.78) |
| Gamle Oslo | 378 (38.4) | 606 (61.6) | .79 (.59-1.06) | Gamle Oslo | 304 (32.8) | 623 (67.2) | .76 (.56-1.04) | Gamle Oslo | 128 (47.2) | 143 (52.8) | **.60 (.37-.97)** |
| Grorud | 70 (27.5) | 185 (72.5) | .81 (.54-1.21) | Grorud | 60 (23.3) | 197 (76.7) | .67 (.43-1.04) | Grorud | 22 (28.9) | 54 (71.1) | .94 (.49-1.79) |
| Søndre Nordstrand | 89 (23.1) | 297 (76.9) | 1.04 (.71-1.52) | Søndre Nordstrand | 75 (18.3) | 334 (81.7) | .82 (.54-1.25) | Søndre Nordstrand | 54 (35.3) | 99 (64.7) | .65 (.37-1.14) |
| Stovner | 44 (19.0) | 188 (81.0) | 1.14 (.74-1.75) | Stovner | 35 (14.7) | 203 (85.3) | .77 (.47-1.24) | Stovner | 27 (28.7) | 67 (71.3) | .73 (.40-1.33) |
| **N** | 830 (30.1) | 1923 (69.9) |  | **N** | 673 (24.7) | 2050 (75.3) |  | **N** | 317 (36.4) | 553 (63.6) |  |
| **Model sig** |  |  | **.000** | **Model sig** |  |  | **.000** | **Model sig** |  |  | **.000** |
| **-2 log likelihood** |  |  | **2210.166** | **-2 log likelihood** |  |  | **1865.00** | **-2 log likelihood** |  |  | **878.638** |
| **Nagelkerke R square** |  |  | **.552** | **Nagelkerke R square** |  |  | **.581** | **Nagelkerke R square** |  |  | **.478** |
